# Supplementary material for: Knowledge and Attitudes of Small Animal Veterinarians on Antimicrobial Use Practices Impacting the Selection of Antimicrobial Resistance in Dogs and Cats in Illinois, United States: A Spatial Epidemiological Approach
Source: MDPI journal article supplement (doi:10.3390/antibiotics12030542), 2023-03-08
Supplement: s1 [file s1]

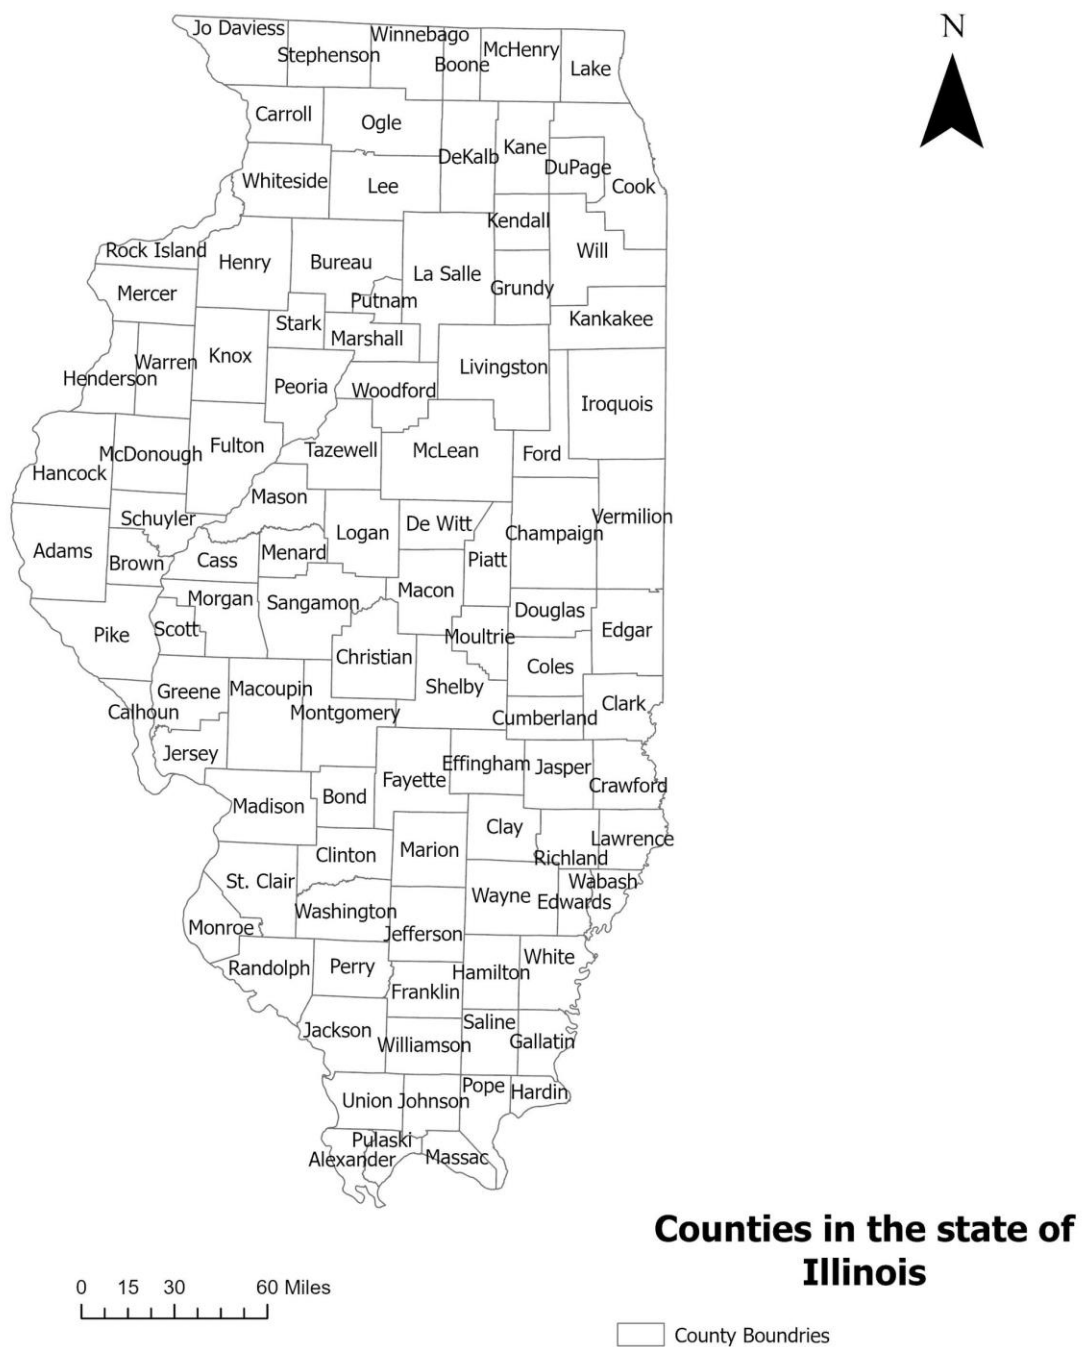

**Figure S1.** Map of the counties in the State of Illinois.

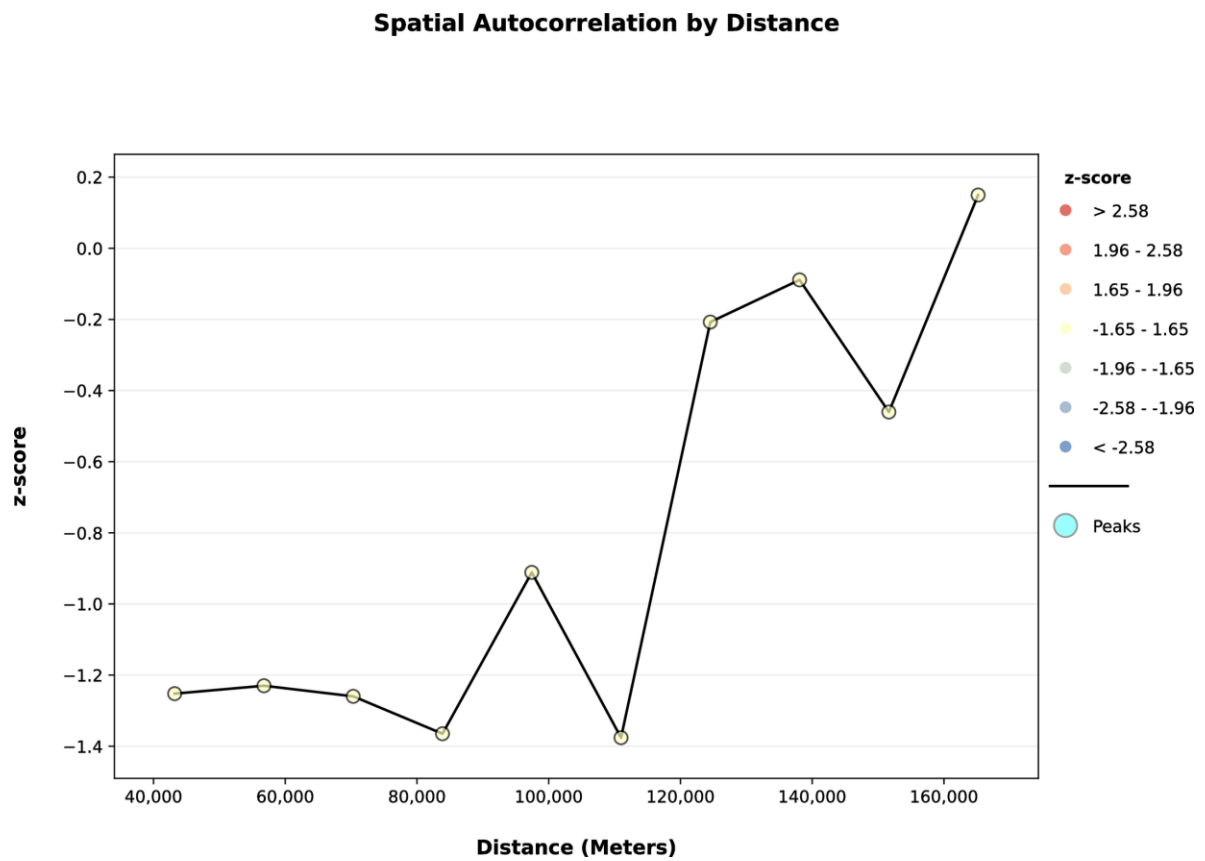

**Figure S2.** Spatial autocorrelation of response rates at different incremental distances.
