# Supplementary material for: Knowledge and Attitudes of Small Animal Veterinarians on Antimicrobial Use Practices Impacting the Selection of Antimicrobial Resistance in Dogs and Cats in Illinois, United States: A Spatial Epidemiological Approach
Source: MDPI journal article supplement (doi:10.3390/antibiotics12030542), 2023-03-08
Supplement: s1 [file s1]

**Table S1.** The number of responders by county.

| County name        | Responders by county |
|--------------------|----------------------|
| Champaign          | 13                   |
| Cook               | 9                    |
| DuPage             | 6                    |
| Lake               | 6                    |
| Will               | 6                    |
| Kane               | 4                    |
| Carroll            | 3                    |
| McHenry            | 3                    |
| Sangamon           | 3                    |
| Woodford           | 3                    |
| Adams              | 2                    |
| Rock Island        | 2                    |
| Winnebago          | 2                    |
| Boone              | 1                    |
| Christian          | 1                    |
| Coles              | 1                    |
| Effingham          | 1                    |
| Fulton             | 1                    |
| Kankakee           | 1                    |
| Kendall            | 1                    |
| Lawrence           | 1                    |
| Livingston         | 1                    |
| Macon              | 1                    |
| McLean             | 1                    |
| Mercer             | 1                    |
| Monroe             | 1                    |
| Moultrie           | 1                    |
| Peoria             | 1                    |
| Randolph           | 1                    |
| St. Clair          | 1                    |
| Tazewell           | 1                    |
| Union              | 1                    |
| Vermilion          | 1                    |
| Williamson         | 1                    |
| <b>Grand Total</b> | <b>83</b>            |
