# Supplementary material for: Knowledge and Attitudes of Small Animal Veterinarians on Antimicrobial Use Practices Impacting the Selection of Antimicrobial Resistance in Dogs and Cats in Illinois, United States: A Spatial Epidemiological Approach
Source: MDPI journal article supplement (doi:10.3390/antibiotics12030542), 2023-03-08
Supplement: s1 [file s1]

**Table S2. Spatial analysis results of Illinois small animal veterinarians survey**

| <b>Analysis</b>        | <b>Method</b>           | <b>Type of Cluster</b> | <b>County</b>                                      |
|------------------------|-------------------------|------------------------|----------------------------------------------------|
| <b>Response rate</b>   | Anselin local Moran's I | High-High              | -                                                  |
|                        |                         | High-Low               | Carroll, Adams, Lawrence, Effingham                |
|                        |                         | Low-Low                | -                                                  |
|                        |                         | Low-High               | -                                                  |
| <b>Knowledge score</b> | Anselin local Moran's I | High-High              | Cook, DuPage, Kankakee, Livingston                 |
|                        |                         | High-Low               | -                                                  |
|                        |                         | Low-Low                | Hamilton, Wayne, Edwards, Clay, Richland, Lawrence |
|                        |                         | Low-High               | Iroquois, Ford, La Salle, Putnam                   |
